# Supplementary material for: Synthesis of Unsaturated Polyester Resins from Various Bio-Derived Platform Molecules
Source: PubMed Central journal article supplement (PMC4519879; doi:10.3390/ijms160714912), 2015-07-02
Supplement: ijms-16-14912-s001.pdf [file ijms-16-14912-s001.pdf]

## Supplementary Information

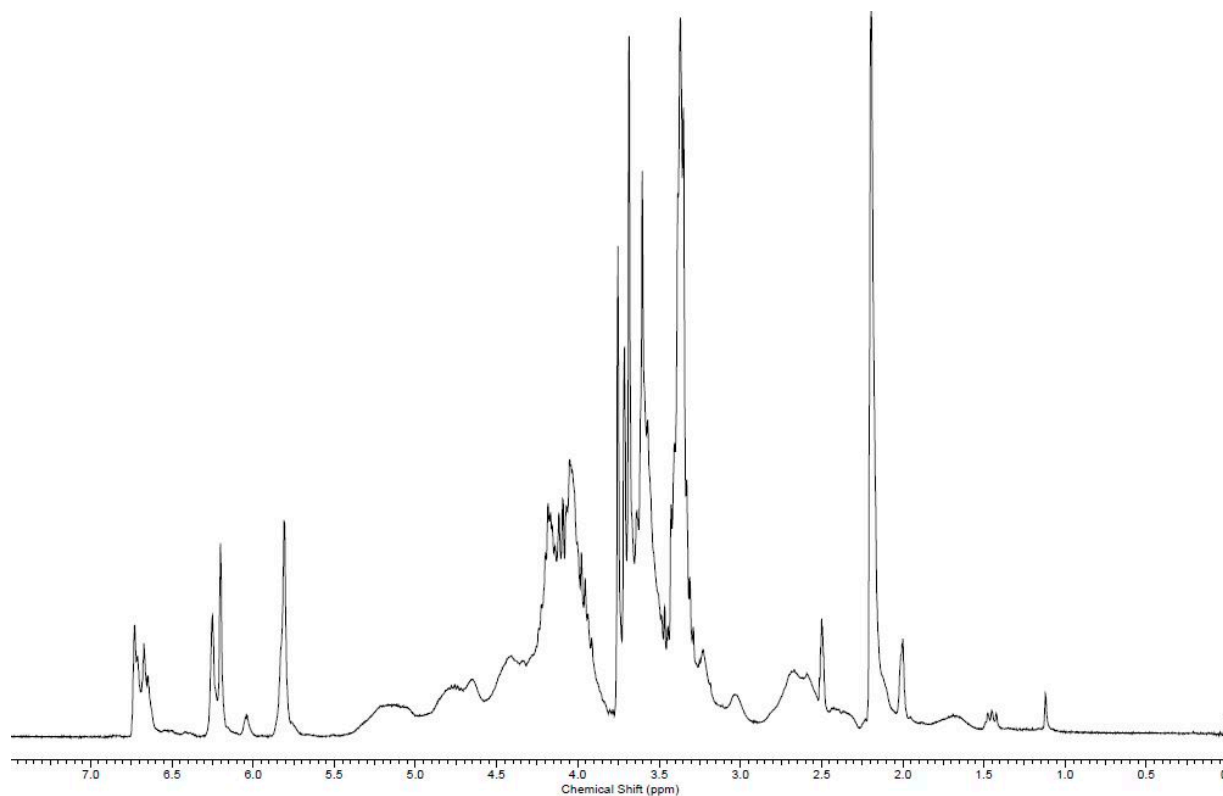

**Figure S1.**  $^1\text{H}$  NMR of PGI.

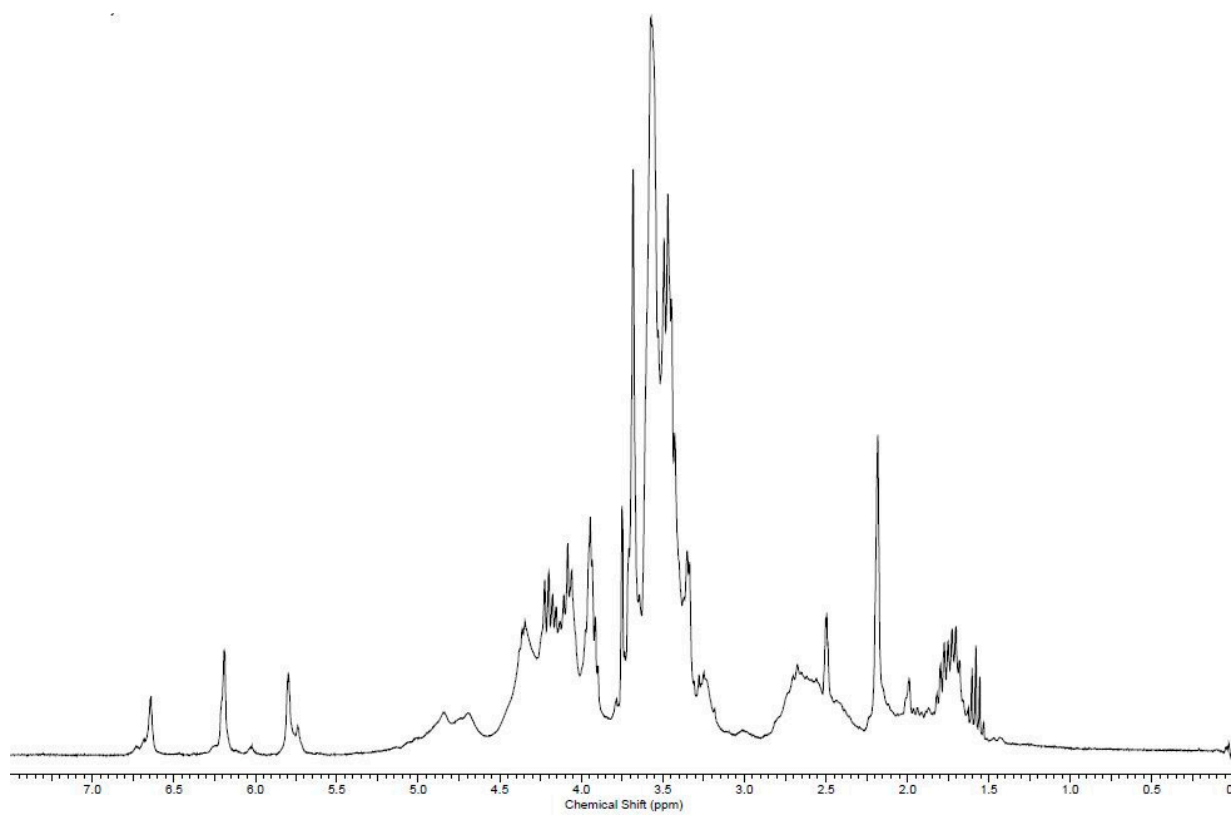

**Figure S2.**  $^1\text{H}$  NMR of PPISI.
